# Supplementary material for: Evidence-Based Considerations for the Design of an Open-Source Ventilator: A Systematic Review
Source: PubMed Central journal article supplement — Crit Care Explor. 2022 Jul 18;4(7):e0723. doi: 10.1097/CCE.0000000000000723 (PMC9249267; doi:10.1097/cce.0000000000000723), 2022-07-18
Supplement: cc9-4-e0723-s001.pdf [file cc9-4-e0723-s001.pdf]

## Supplemental Digital Content 1. Search Strategy

Database: Ovid MEDLINE(R) ALL <1946 to February 17, 2022>

Search Strategy:

- 
- 1 ((acute\$ or hypoxemic\$ or severe\$ or hypoxic\$ or hypercapn\$ or hypercarb\$) and (respirat\$ adj5 (failure\$ or insufficien\$ or paralysis\$ or deficienc\$ or disturbanc\$ or depression))).mp. (36886)
  - 2 ((acute or hypox\$ or respirat\$ or failure\$) and (ARF or AHRF)).mp. (5540)
  - 3 or/1-2 [concept 1 - acute respiratory/ hypoxemic failure ] (41221)
  - 4 Anoxia/ or exp Dyspnea/ or (anoxemia\$ or anoxia\$ or dyspnea\$ or (deficien\$ adj3 oxygen\$) or hypoxemia\$ or hypoxia\$ or hypoxemic\$ or hypoxic\$ or hypercapn\$ or hypercarb\$).ti. or (anoxemia\$ or anoxia\$ or dyspnea\$ or (deficien\$ adj3 oxygen\$) or hypoxemia\$ or hypoxia\$ or hypoxemic\$ or hypoxic\$ or hypercapn\$ or hypercarb\$).ab. /freq=2 (165492)
  - 5 Acute Lung Injury/ or (acute\$ and (lung\$ adj2 injur\$)).tw. or ((lung\$ or pulmonary\$) adj3 (failure\$ or insufficien\$)).tw. (31347)
  - 6 Respiratory Distress Syndrome, Adult/ or ((respirator\$ adj2 distress\$ adj2 syndrom\$) or ARDS).tw. or ((acute\$ or adult\$) adj3 (respirator\$ adj3 distress\$)).mp. (46421)
  - 7 exp Respiratory Insufficiency/ or (respirat\$ adj3 (failure\$ or insufficien\$ or paralysis\$ or deficienc\$ or disturbanc\$ or depression)).tw. (105857)
  - 8 (lung\$ adj2 shock\$).tw. (621)
  - 9 ((post traumatic\$ or posttraumatic\$) adj3 pulmonar\$ adj3 insufficienc\$).tw. (69)
  - 10 (((post traumatic\$ or posttraumatic\$) adj3 (respirator\$ or lung\$)) and failure\$).tw. (70)
  - 11 (2019-nCoV\$ or nCoV or COVID-19 or covid19 or COVID or CoV-2 or ("2019\$" or "19" or novel\$ or new or newly or SARS-like or unknown\$) adj5 (coronavir\$ or corona-vir\$ or CoV or CoVs or betacoronavir\$ or betacorona-vir\$ or beta-coronavir\$ or beta-corona-vir\$)).mp. (230629)
  - 12 (Severe Acute Respiratory Syndrome Coronavirus 2 or Severe Acute Respiratory Syndrome Corona virus 2 or Severe Acute Respiratory Syndrome Coronavirus 19 or Severe Acute Respiratory Syndrome Corona virus 19).mp. (22599)
  - 13 (SARS Coronavirus 2 or SARS-Cov-2).mp. (146715)
  - 14 ((Wuhan or China or Chinese) and (coronavir\$ or COVID or nCoV or corona-vir\$ or CoV or CoVs or betacoronavir\$ or betacorona-vir\$ or beta-coronavir\$ or beta-corona-vir\$)).mp. (19091)
  - 15 (pneumon\$ adj3 ((unknown\$ or unusual\$ or atypical\$ or abnormal\$) and (etiolog\$ or aetiology\$ or Wuhan or China or Chinese))).mp. (1414)
  - 16 or/4-15 [concept 1 Expanded - acute respiratory failure ] (542774)

17 3 or 16 (547983)  
18 exp Respiration, Artificial/ or exp Ventilators, Mechanical/ or Pneumonia, Ventilator-Associated/ (93853)  
19 ((ventilat\$ or respirat\$) adj2 (artificial\$ or mechanical\$ or pneumon\$ or controlled)).tw,kf. (79695)  
20 (respirat\$ adj2 assisted\$).tw,kf. (303)  
21 (ventilat\$ adj3 patient\$).mp. or (ventilat\$ and patient\$).ti. or (ventilat\$ and patient\$).ab. /freq=3 (43200)  
22 (PPV and (pressure or ventilat\$)).tw,kf. or (IPPB or IPPV).mp. or (CPAP or NCPAP or APVR).mp. (12904)  
23 (positive adj3 pressure adj5 (ventilat\$ or respir\$ or intermittent\$)).tw,kf. (11472)  
24 (respirator or (ventilat\$ adj3 pulmonary\$) or interactive\$ ventilat\$ support\$ or airway pressure release ventilati\$).mp. (22581)  
25 ((pressure\$ or ventilat\$) and (bilevel or bi-level or biphasic or bi-phasic or BIPAP)).tw,kf. (4489)  
26 (((high\$ flow\$ or highflow\$) adj5 therap\$) and (nasal\$ or can?ul\$ or prong\$)).tw,kf. (901)  
27 (((high\$ flow\$ or highflow\$) adj5 can?ul\$) or (nasal\$ adj5 (high\$ flow\$ or highflow\$ or prong\$))).tw,kf. (2871)  
28 (high\$ flow\$ or highflow\$ or high pressure\$ or highpressure\$ or high tension\$ or hyperbaric\$).tw,kf. and ((oxygen or O2).tw,kf. or exp Oxygen Inhalation  
Therapy/) and (nasal\$ or can?ul\$ or prong\$).tw,kf. (1973)  
29 (Vapotherm or Airvo 2 or Optiflow).tw,kf. or (High\$ adj2 FiO2).tw. or (HFNC or hfnp or HHFNx or HHFNC or HHHFNC or HHFO2).tw. (1420)  
30 or/18-29 [concept 3 - ventilated patients MEDLINE] (172687)  
31 8 and 17 (621)  
32 exp clinical pathway/ or exp clinical protocol/ or exp consensus/ or exp consensus development conference/ or exp consensus development conferences  
as topic/ or critical pathways/ or exp guideline/ or guidelines as topic/ or exp practice guideline/ or practice guidelines as topic/ or health planning guidelines/  
or exp treatment guidelines/ (415147)  
33 (guideline or practice guideline or consensus development conference or consensus development conference, NIH).pt. (46623)  
34 (position statement\* or policy statement\* or practice parameter\* or best practice\*).ti,ab,kf,kw. (40389)  
35 (standards or guideline or guidelines).ti,kf,kw. (124518)  
36 ((practice or treatment\* or clinical) adj guideline\*).ab. or clinical\$ guide\$.ti,ab,tw,kf. (49788)  
37 (CPG or CPGs).ti. (6141)  
38 consensus\*.ti,kf,kw. (30933)  
39 consensus\*.ab. /freq=2 (30036)  
40 ((critical or clinical or practice) adj2 (path or paths or pathway or pathways or protocol\*)).ti,ab,kf,kw. (23793)

41 recommendat\*.ti,kf,kw. (48177)  
 42 (care adj2 (standard or path or paths or pathway or pathways or map or maps or plan or plans)).ti,ab,kf,kw. (72258)  
 43 (algorithm\* adj2 (screening or examination or test or tested or testing or assessment\* or diagnosis or diagnoses or diagnosed or diagnosing)).ti,ab,kf,kw.  
 (9136)  
 44 (algorithm\* adj2 (pharmacotherap\* or chemotherap\* or chemotreatment\* or therap\* or treatment\* or intervention\*)).ti,ab,kf,kw. (11608)  
 45 or/32-44 [concept 2 - CADTH database search filters Guidelines — OVID Medline, Embase, PsycINFO] (692979)  
 46 17 and 30 and 45 [Expanded ] (2172)  
 47 (ventilat\$ adj2 mechanical\$).ti. or (ventilat\$ adj2 mechanical\$).ab. /freq=2 (24443)  
 48 (guideline or guidelines).ti,kf,kw. or ((practice or treatment\* or clinical) adj guideline\*).ab. or clinical\$ guide\$.ti,ab,tw,kf. (132717)  
 49 47 and 48 (251)  
 50 46 or 49 (2328)

**51 limit 50 to yr="2010 -Current" (1652)**

\*\*\*\*\*

**Database: Embase Classic+Embase <1947 to 2022 February 17>**

Search Strategy:

-----

1 ((acute\$ or hypoxemic\$ or severe\$ or hypoxic\$ or hypercapn\$ or hypercarb\$) and (respirat\$ adj5 (failure\$ or insufficien\$ or paralysis\$ or deficienc\$ or disturbanc\$ or depression))).mp. (79959)  
 2 ((acute or hypox\$ or respirat\$ or failure\$) and (ARF or AHRF)).tw,kw. (8369)  
 3 or/1-2 [concept 1 - acute respiratory/ hypoxemic failure ] (86101)  
 4 \*Anoxia/ or exp \*Dyspnea/ or (anoxemia\$ or anoxia\$ or dyspnea\$ or (deficien\$ adj3 oxygen\$) or hypoxemia\$ or hypoxia\$ or hypoxemic\$ or hypoxic\$ or hypercapn\$ or hypercarb\$).ti. or (anoxemia\$ or anoxia\$ or dyspnea\$ or (deficien\$ adj3 oxygen\$) or hypoxemia\$ or hypoxia\$ or hypoxemic\$ or hypoxic\$ or hypercapn\$ or hypercarb\$).ab. /freq=2 (192282)  
 5 \*acute lung injury/ or (acute\$ and (lung\$ adj2 injur\$)).tw,kw. or ((lung\$ or pulmonary\$) adj3 (failure\$ or insufficien\$)).tw,kw. (46636)  
 6 \*respiratory distress syndrome/ or ((respirator\$ adj2 distress\$ adj2 syndrom\$) or ARDS).tw. or ((acute\$ or adult\$) adj3 (respirator\$ adj3 distress\$)).tw,kw. (56914)  
 7 exp \*respiratory failure/ or (respirat\$ adj3 (failure\$ or insufficien\$ or paralysis\$ or deficienc\$ or disturbanc\$ or depression)).tw,kw. (110295)

8 (lung\$ adj2 shock\$).tw. (969)

9 ((post traumatic\$ or posttraumatic\$) adj3 pulmonar\$ adj3 insufficienc\$).tw. (107)

10 (((post traumatic\$ or posttraumatic\$) adj3 (respirator\$ or lung\$)) and failure\$).tw. (100)

11 (2019-nCoV\$ or nCoV or COVID-19 or covid19 or COVID or CoV-2 or ("2019\$" or "19" or novel\$ or new or newly or SARS-like or unknown\$) adj5 (coronavir\$ or corona-vir\$ or CoV or CoVs or betacoronavir\$ or betacorona-vir\$ or beta-coronavir\$ or beta-corona-vir\$)).tw,kw. (232148)

12 (Severe Acute Respiratory Syndrome Coronavirus 2 or Severe Acute Respiratory Syndrome Corona virus 2 or Severe Acute Respiratory Syndrome Coronavirus 19 or Severe Acute Respiratory Syndrome Corona virus 19).tw,kw. (21361)

13 (SARS Coronavirus 2 or SARS-Cov-2).tw,kw. (76388)

14 ((Wuhan or China or Chinese) and (coronavir\$ or COVID or nCoV or corona-vir\$ or CoV or CoVs or betacoronavir\$ or betacorona-vir\$ or beta-coronavir\$ or beta-corona-vir\$)).tw,kw. (16267)

15 (pneumon\$ adj3 ((unknown\$ or unusual\$ or atypical\$ or abnormal\$) and (etiolog\$ or aetiology\$ or Wuhan or China or Chinese))).tw,kw. (2347)

16 or/4-15 [concept 1 Expanded - acute respiratory failure ] (596194)

17 3 or 16 (619596)

18 exp \*artificial ventilation/ or exp \*assisted ventilation/ or (ventilat\$ adj2 (artificial\$ or mechanical\$ or pneumon\$)).tw. or \*ventilator associated pneumonia/ (171905)

19 ((ventilat\$ or respirat\$) adj2 (artificial\$ or mechanical\$ or pneumon\$ or controlled)).tw,kw. (125621)

20 (respirat\$ adj2 assisted\$).tw,kw. (741)

21 (ventilat\$ adj3 patient\$).tw,kw. or (ventilat\$ and patient\$).ti. or (ventilat\$ and patient\$).ab. /freq=3 (72030)

22 ((PPV and (pressure or ventilat\$)) or (IPPB or IPPV) or (CPAP or NCPAP or APVR)).tw,kw. (23864)

23 (positive adj3 pressure adj5 (ventilat\$ or respir\$ or intermittent\$)).tw,kw. (16355)

24 (respirator or (ventilat\$ adj3 pulmonary\$) or interactive\$ ventilat\$ support\$ or airway pressure release ventilati\$).tw,kw. (16633)

25 ((pressure\$ or ventilat\$) and (bilevel or bi-level or biphasic or bi-phasic or BIPAP)).tw,kw. (7128)

26 \*hyperbaric oxygen/ and (exp \*nasal cannula/ or (nasal\$ or can?ul\$ or prong\$).tw. or ((nasal or nose) adj3 tube\$1).tw. or (Filterline or Smart CapnoLine).tw.) (66)

27 (((high\$ flow\$ or highflow\$) adj5 therap\$) and (nasal\$ or can?ul\$ or prong\$)).tw,kw. (1391)

28 (((high\$ flow\$ or highflow\$) adj5 can?ul\$) or (nasal\$ adj5 (high\$ flow\$ or highflow\$ or prong\$))).tw,kw. (4942)

29 (high\$ flow\$ or highflow\$ or high pressure or highpressure or high tension or hightension or hyperbaric\$).tw. and ((oxygen or O2).tw. or exp \*oxygen therapy/) and (exp \*nasal cannula/ or ((nasal or nose) adj3 tube\$1).tw. or (nasal\$ or can?ul\$ or prong\$).tw.) (3192)

30 (Vapotherm or Airvo 2 or Optiflow or (High\$ adj2 FiO2) or (HFNC or hfnp or HHFNox or HHFNC or HHHFNC or HHFO2)).tw. (2869)

31 (high\$ flow\$ or highflow\$ or (High\$ adj2 FiO2)).tw. and (exp \*nasal cannula/ or (nasal\$ or can?ul\$ or prong\$).tw. or ((nasal or nose) adj3 tube\$1).tw. or (Filterline or Smart CapnoLine).tw.) (4963)

32 or/18-31 [concept 3 - ventilated patients EMBASE] (245785)

33 8 and 17 (969)

34 exp clinical pathway/ or exp clinical protocol/ or exp consensus/ or exp consensus development conference/ or exp consensus development conferences as topic/ or critical pathways/ or exp guideline/ or guidelines as topic/ or exp practice guideline/ or practice guidelines as topic/ or health planning guidelines/ or exp treatment guidelines/ (797750)

35 (guideline or practice guideline or consensus development conference or consensus development conference, NIH).pt. (0)

36 (position statement\* or policy statement\* or practice parameter\* or best practice\*).ti,ab,kw. (58004)

37 (standards or guideline or guidelines).ti,kw. (155690)

38 ((practice or treatment\* or clinical) adj guideline\*).ab. or clinical\$ guide\$.ti,ab,tw. (74317)

39 (CPG or CPGs).ti. (7352)

40 consensus\*.ti,kw. (37494)

41 consensus\*.ab. /freq=2 (39675)

42 ((critical or clinical or practice) adj2 (path or paths or pathway or pathways or protocol\*)).ti,ab,kw. (35414)

43 recommendat\*.ti,kw. (59389)

44 (care adj2 (standard or path or paths or pathway or pathways or map or maps or plan or plans)).ti,ab,kw. (126879)

45 (algorithm\* adj2 (screening or examination or test or tested or testing or assessment\* or diagnosis or diagnoses or diagnosed or diagnosing)).ti,ab,kw. (12789)

46 (algorithm\* adj2 (pharmacotherap\* or chemotherap\* or chemotreatment\* or therap\* or treatment\* or intervention\*)).ti,ab,kw. (17152)

47 or/34-46 [concept 2 - CADTH database search filters Guidelines — OVID Medline, Embase, PsycINFO] (1156687)

48 17 and 32 and 47 [Expanded ] (3828)

49 (ventilat\$ adj2 mechanical\$).ti. or (ventilat\$ adj2 mechanical\$).ab. /freq=2 (38237)

50 (guideline or guidelines).ti,kw. or ((practice or treatment\* or clinical) adj guideline\*).ab. or clinical\$ guide\$.ti,ab,tw. (182031)

51 49 and 50 (399)

52 48 or 51 [ADD English language? AND last 10 or 5 years?] (4092)

53 limit 52 to yr="2010 -Current" [ADD mechanical ventilation and non-invasive ventilation (such as High-Flow Nasal Cannula, Face mask, and BiPAP)] (3324)

**54 limit 53 to embase [to remove conferences] (1783)**

\*\*\*\*\*

**Supplemental Digital Content 2.** AGREE-II domain quality scores are presented. Green boxes are for scores >70%, yellow is 60-70%, and red are for scores <60%.

| Study          | Scope and Purpose | Stakeholder Involvement | Rigor of Development | Clarity and Presentation | Applicability | Editorial Independence |
|----------------|-------------------|-------------------------|----------------------|--------------------------|---------------|------------------------|
| Fan 2017       | 97.2              | 80.6                    | 92.7                 | 94.4                     | 83.3          | 100.0                  |
| Griffiths 2019 | 97.2              | 72.2                    | 88.5                 | 97.2                     | 87.5          | 91.7                   |
| Rhodes 2016    | 100.0             | 75.0                    | 91.7                 | 88.9                     | 81.3          | 100.0                  |
| Caesson 2014   | 91.7              | 77.8                    | 70.8                 | 63.9                     | 62.5          | 87.5                   |
| Cho 2016       | 86.1              | 77.8                    | 87.5                 | 86.1                     | 77.1          | 83.3                   |
| Alhazzani 2020 | 97.2              | 83.3                    | 95.8                 | 94.4                     | 91.7          | 100.0                  |
| Quintard 2019  | 66.7              | 66.7                    | 31.3                 | 77.8                     | 47.9          | 75.0                   |
| Fichtner 2018  | 83.3              | 80.6                    | 85.4                 | 80.6                     | 81.3          | 91.7                   |
| Joannidis 2019 | 69.4              | 66.7                    | 69.8                 | 72.2                     | 64.6          | 83.3                   |
| Hashmi 2015    | 91.7              | 77.8                    | 64.6                 | 69.4                     | 75.0          | 95.8                   |
| Hashimoto 2017 | 91.7              | 86.1                    | 95.8                 | 97.2                     | 95.8          | 95.8                   |

|                |      |      |      |      |      |      |
|----------------|------|------|------|------|------|------|
| Pappazian 2019 | 94.4 | 75.0 | 85.4 | 94.4 | 77.1 | 91.7 |
| Neto 2021      | 91.4 | 83.1 | 88.7 | 92.9 | 89.1 | 96.6 |

**Supplemental Digital Content 3.** Characteristics and summary of included guidelines and their relevant recommendations.



| Study          | Recommendation                                                                                                                               | Country/<br>Region       | Patient<br>Population | Impact on Outcome |           | Level of<br>Recommendation | Level of<br>Evidence | Number of<br>Studies<br>(Patients)<br>Included | Assessed<br>Quality of<br>Evidence? |
|----------------|----------------------------------------------------------------------------------------------------------------------------------------------|--------------------------|-----------------------|-------------------|-----------|----------------------------|----------------------|------------------------------------------------|-------------------------------------|
|                |                                                                                                                                              |                          |                       | Morbidity         | Mortality |                            |                      |                                                |                                     |
| Fan 2017       | Limit Tidal Volumes to 4-8mL/kg and maintain plateau pressure <30cm H2O                                                                      | North America and Europe | ARDS patients in ICU  | RR 0.96           | RR 0.87   | Strong                     | Moderate             | 7 (1481)                                       | GRADE                               |
|                | Patients with moderate or severe ARDS receive higher rather than lower levels of PEEP                                                        | North America and Europe | ARDS patients in ICU  | -                 | RR 0.91   | Conditional                | Moderate             | 6 (2580)                                       | GRADE                               |
|                | Recommend High-Frequency Oscillatory Ventilation (HFOV) should not be routinely used in moderate to severe ARDS.                             | North America and Europe | ARDS patients in ICU  | RR 1.15           | RR 0.94   | Strong                     | Moderate             | 6 (1715)                                       | GRADE                               |
|                | Suggest that adult patients with ARDS receive recruitment maneuvers (RMs)                                                                    | North America and Europe | ARDS patients in ICU  | -                 | RR 0.91   | Conditional                | Low-Moderate         | 6 (1423)                                       | GRADE                               |
| Griffiths 2019 | Lower tidal volume (less than or equal to 6 mL/kg predicted body weight) ventilation with a plateau pressure less than or equal to 30 cmH2O. | British                  | ARDS patients in ICU  | RR 1.17           | RR 0.83   | Strong                     | Moderate             | 3 (1038)                                       | GRADE                               |

|               |                                                                                                       |             |                      |         |         |                  |          |          |       |
|---------------|-------------------------------------------------------------------------------------------------------|-------------|----------------------|---------|---------|------------------|----------|----------|-------|
|               | Suggest the use of high PEEP strategies for patients with moderate or severe ARDS (P/F ratio <27 kPa) | British     | ARDS patients in ICU | RR 0.97 | RR 0.83 | Weak             | Moderate | 3 (1921) | GRADE |
|               | Do not recommend use of HFOV in ARDS patients.                                                        | British     | ARDS patients in ICU | RR 1.21 | RR 1.04 | Strongly Against | Moderate | 5 (1380) | GRADE |
| Claesson 2014 | Suggest utilisation of small tidal volumes (5-8ml/kg) and plateau pressure <31 cm H2O                 | Scandinavia | ARDS patients in ICU | RR 0.92 | RR 0.83 | Strong           | High     | 6 (1297) | GRADE |
|               | In patients with moderate to severe ARDS we suggest increasing PEEP to improve oxygenation efficiency | Scandinavia | ARDS patients in ICU | RR 1.19 | RR 0.87 | Weak             | Moderate | 6 (2299) | GRADE |
|               | We suggest that partial modes of ventilatory support may be used if clinically feasible.              | Scandinavia | ARDS patients in ICU | RR 1.23 | RR 0.78 | Weak             | Very Low | 3        | GRADE |

|                |                                                                                                                                                                                                                                                                                          |                          |                      |         |         |        |          |          |       |
|----------------|------------------------------------------------------------------------------------------------------------------------------------------------------------------------------------------------------------------------------------------------------------------------------------------|--------------------------|----------------------|---------|---------|--------|----------|----------|-------|
|                | We suggest that both pressure and volume-regulated ventilation may be used in mechanically ventilated patients with ARDS. We suggest that both modes of ventilation are equally beneficial or detrimental, and that both modes can be used at the discretion of the attending physician. | Scandinavia              | ARDS patients in ICU | RR 1.23 | RR 0.78 | Weak   | Low      | 3 (136)  | GRADE |
| Alhazzani 2020 | We recommend using low tidal volume ventilation (Vt 4-8mL/kg of predicted body weight), over higher tidal volumes (Vt > 8mL/kg)                                                                                                                                                          | North America and Europe | COVID-19 ARDS in ICU | -       | RR 0.73 | Strong | Moderate | 5 (1181) | GRADE |
|                | We recommend targeting plateau pressures (Pplat) of <30cm H2O                                                                                                                                                                                                                            | North America and Europe | COVID-19 ARDS in ICU | -       | RR 0.80 | Strong | Moderate | 9 (1629) | GRADE |
|                | We suggest using a higher PEEP strategy, over a lower PEEP strategy                                                                                                                                                                                                                      | North America and Europe | COVID-19 ARDS in ICU | -       | RR 0.94 | Weak   | Low      | 3 (2299) | GRADE |

|                   |                                                                                                                               |       |             |         |         |        |          |          |       |
|-------------------|-------------------------------------------------------------------------------------------------------------------------------|-------|-------------|---------|---------|--------|----------|----------|-------|
| Hashimoto<br>2017 | We recommend the use of low tidal volume at 6-8 mL/kg (predicted body weight: PBW) in adult patients with ARDS                | Japan | ARDS in ICU | RR 0.82 | RR 0.84 | Strong | Moderate | 6 (1305) | GRADE |
|                   | We suggest setting the plateau pressure at 30cmH2O or less in adult patients with ARDS undergoing mechanical ventilation.     | Japan | ARDS in ICU | RR 0.92 | RR 0.84 | Weak   | Low      | 4 (1132) | GRADE |
|                   | We suggest using PEEP within the range of plateau pressures less than or equal to 30cmH2O, without compromising hemodynamics. | Japan | ARDS in ICU | RR 0.97 | RR 0.83 | Weak   | Moderate | 3        | GRADE |
|                   | We suggest against the use of High Frequency Oscillation (HFO) in adult patients with ARDS                                    | Japan | ARDS in ICU | RR 1.21 | RR 1.05 | Weak   | Low      | 4        | GRADE |

|                   |                                                                                                                                                                                                                |         |             |   |        |        |          |          |       |
|-------------------|----------------------------------------------------------------------------------------------------------------------------------------------------------------------------------------------------------------|---------|-------------|---|--------|--------|----------|----------|-------|
| Pappazian<br>2019 | A tidal volume around 6 mL/kg of predicted body weight (PBW) should be used as a first approach in patients with recognized ARDS, in the absence of severe metabolic acidosis, including those with mild ARDS. | Germany | ARDS in ICU | - | RR 0.8 | Strong | High     | 7 (1481) | GRADE |
|                   | Once tidal volume is set to around 6 mL/kg PBW, plateau pressure should be monitored continuously and should not exceed 30 cmH <sub>2</sub> O.                                                                 | Germany | ARDS in ICU | - | -      | Strong | High     |          | GRADE |
|                   | High PEEP should probably be used in patients with moderate or severe ARDS, but not in patients with mild ARDS.                                                                                                | Germany | ARDS in ICU | - | -      | Strong | High     |          | GRADE |
|                   | High-frequency oscillation ventilation should not be used in ARDS patients.                                                                                                                                    | Germany | ARDS in ICU | - | -      | Strong | High     |          | GRADE |
|                   | Recruitment maneuvers should probably not be used routinely in ARDS patients.                                                                                                                                  | Germany | ARDS in ICU | - | -      | Weak   | Moderate | -        | GRADE |

|             |                                                                                                                                                        |          |                      |   |   |        |          |   |       |
|-------------|--------------------------------------------------------------------------------------------------------------------------------------------------------|----------|----------------------|---|---|--------|----------|---|-------|
| Hashmi 2015 | Lung protective strategies should be used i.e. a tidal volume of 6-8 ml/ kg of predicted body weight.                                                  | Pakistan | Sepsis/ARDS          | - | - | Strong | High     | - | GRADE |
|             | Measuring and keeping plateau pressure < 30 mmHg.                                                                                                      | Pakistan | Sepsis/ARDS          | - | - | Strong | Moderate | - | GRADE |
|             | Suggest adequate PEEP to avoid alveolar collapse.                                                                                                      | Pakistan | Sepsis/ARDS          | - | - | Strong | Moderate | - | GRADE |
| Rhodes 2016 | Recommend using a target tidal volume of 6 mL/kg predicted body weight                                                                                 | British  | ARDS patients in ICU | - | - | Strong | High     | - | GRADE |
|             | Recommend using an upper limit goal for plateau pressures of 30 cm H2O over higher plateau pressures in adult patients with sepsis-induced severe ARDS | British  | ARDS patients in ICU | - | - | Strong | High     | - | GRADE |
|             | Suggest using higher PEEP over lower PEEP in adult patients with sepsis-induced moderate to severe ARDS                                                | British  | ARDS patients in ICU | - | - | Weak   | Moderate | - | GRADE |

|                |                                                                                                                                                                                                                                         |               |                                         |   |   |        |          |         |       |
|----------------|-----------------------------------------------------------------------------------------------------------------------------------------------------------------------------------------------------------------------------------------|---------------|-----------------------------------------|---|---|--------|----------|---------|-------|
| Cho 2016       | We recommend low tidal volume ventilation can be applied to patients with ARDS.                                                                                                                                                         | Korean        | ARDS patients in ICU                    | - | - | Strong | High     |         | GRADE |
|                | We suggest high PEEP can be applied to patients with ARDS, who have Pao <sub>2</sub> /FIO <sub>2</sub> <200 mmHg.                                                                                                                       | Korean        | ARDS patients in ICU                    | - | - | Weak   | Moderate |         | GRADE |
|                | We suggest recruitment maneuver can be applied to patients with ARDS to reduce mortality                                                                                                                                                | Korean        | ARDS patients in ICU                    | - | - | Weak   | Moderate |         | GRADE |
|                | The use of HFOV should not be recommended as a standard treatment method in adult patients with ARDS                                                                                                                                    | Korean        | ARDS patients in ICU                    | - | - | Strong | Moderate |         | GRADE |
| Joannidis 2019 | We recommend monitoring of tidal volumes and ventilation pressures and application of lung protective ventilation strategies (low-tidal volume) in patients receiving mechanical ventilation to reduce the risk of new or worsening AKI | International | Multi-organ dysfunction patients in ICU | - | - | Strong | Low      | 1 (861) | GRADE |

|               |                                                                                                                                                 |         |                      |   |   |        |          |   |       |
|---------------|-------------------------------------------------------------------------------------------------------------------------------------------------|---------|----------------------|---|---|--------|----------|---|-------|
| Quintard 2019 | A PEEP of at least 5 cmH2O should probably be applied after intubation of hypoxaemic patients.                                                  | French  | ICU Patients         | - | - | Strong | -        | - | GRADE |
| Fichtner 2018 | A post-intubation recruitment manoeuvre should probably be used in ICU in hypoxaemic patients, by integrating it into the respiratory component | French  | ICU Patients         | - | - | Strong | -        | - | GRADE |
|               | Ventilation with high PEEP is recommended                                                                                                       | Germany | ARDS Patients in ICU | - | - | Strong | High     | - | GRADE |
|               | It is recommended that ARDS patients should be ventilated with a Vt not exceeding 6 mL/kg standard body weight (BW)                             | Germany | ARDS Patients in ICU | - | - | Strong | Moderate | - | GRADE |



|           |                                                                                                                                                                                                                                                                       |         |                      |   |   |        |                  |   |       |
|-----------|-----------------------------------------------------------------------------------------------------------------------------------------------------------------------------------------------------------------------------------------------------------------------|---------|----------------------|---|---|--------|------------------|---|-------|
|           | It is recommended that mechanically ventilated patients should be treated with the lowest possible FiO2 with which a target arterial oxygen saturation (SaO2) of 90–94% or an arterial partial pressure of oxygen (PaO2) of 60–80 mmHg (8.0–10.7 kPa) can be attained | Germany | ARDS Patients in ICU | - | - | Weak   | Expert Consensus | - | GRADE |
|           | The peak inspiratory pressure for patients with ARDS should not exceed 30 cm H2O                                                                                                                                                                                      | Germany | ARDS Patients in ICU | - | - | Strong | Moderate         | - | GRADE |
|           | It is recommended that high frequency oscillation ventilation (HFOV) should not be used to treat adult patients with ARDS                                                                                                                                             | Germany | ARDS Patients in ICU | - | - | Strong | High             | - | GRADE |
| Neto 2021 | We recommend using a low tidal volume (4–8 mL/kg of PBM), and whenever possible, a tidal volume ≤6 mL/kg of PBW should be pursued                                                                                                                                     | LMICs   | COVID-19             | - | - | Strong | High             | - | GRADE |

|  |                                                                                                              |       |          |   |   |          |     |   |       |
|--|--------------------------------------------------------------------------------------------------------------|-------|----------|---|---|----------|-----|---|-------|
|  | We recommend using a “low PEEP/high FiO2 table”                                                              | LMICs | COVID-19 | - | - | Moderate | Low | - | GRADE |
|  | We recommend against using routine recruitment maneuvers, unless as a rescue therapy in refractory hypoxemia | LMICs | COVID-19 | - | - | Moderate | Low | - | GRADE |

**Supplemental Digital Content 4.** All the guidelines that made a recommendation on PEEP are presented below with effect size and confidence intervals.

| Study    | Recommendations                                                                                    | Impact on Morbidity                                                      | Impact on Mortality                                                                                                                | Level of Recommendation | Confidence in Effect Estimate | Source of Evidence | Studies Included No. (Participants) | Mortality Effect Size (Confidence Interval) | Type of Morbidity                                                                                                                                           | Studies Included, No. | Morbidity Effect Size (Confidence Interval) |
|----------|----------------------------------------------------------------------------------------------------|--------------------------------------------------------------------------|------------------------------------------------------------------------------------------------------------------------------------|-------------------------|-------------------------------|--------------------|-------------------------------------|---------------------------------------------|-------------------------------------------------------------------------------------------------------------------------------------------------------------|-----------------------|---------------------------------------------|
| Fan 2017 | Suggest that patients with moderate or severe ARDS receive higher rather than lower levels of PEEP | No difference in barotrauma, new organ failure, or ventilator-free days. | No difference in mortality in RCTs but IPDMA from 3 large RCTs showed improved mortality in patients with moderate to severe ARDS. | Conditional             | Moderate                      | RCTs and IPDMA     | 6 (2580)                            | RR 0.91 (0.8-1.03)                          | A) Oxygenation<br>B) Higher PEEP strategies were not associated with significant difference in barotrauma, new organ failure, or VFDs (moderate confidence) |                       | a) 61 mmHg (46-77)                          |

|                |                                                                                                         |                                                             |                                                                                                                                                                                                                                                                       |                 |          |             |                                              |                     |                                   |          |                                                                     |
|----------------|---------------------------------------------------------------------------------------------------------|-------------------------------------------------------------|-----------------------------------------------------------------------------------------------------------------------------------------------------------------------------------------------------------------------------------------------------------------------|-----------------|----------|-------------|----------------------------------------------|---------------------|-----------------------------------|----------|---------------------------------------------------------------------|
| Griffiths 2019 | Suggest the use of high PEEP strategies for patients with moderate or severe ARDS (P/F ratio <27 kPa)   | No difference in barotrauma or ICU free days.               | Three RCTs and a meta-analysis show improved ICU mortality with high PEEP strategy.                                                                                                                                                                                   | Weakly In Favor | Moderate | RCTs and MA | 5 (1921)                                     | RR 0.83 (0.67-1.01) | A) Barotrauma<br>b) ICU free days | 5 (2504) | A) RR 0.97 (0.66-1.42)<br>B) 0.04 Mean difference higher (0.03-1.1) |
| Rhodes 2016    | Suggest using higher PEEP over lower PEEP in adult patients with sepsis-induced moderate to severe ARDS | Three RCTs and one plot trial did not show benefit or harm. | A patient-level meta-analysis showed no benefit in all patients with ARDS; however, patients with moderate or severe ARDS (Pao <sub>2</sub> /Fio <sub>2</sub> ≤ 200 mm Hg) had decreased mortality with the use of higher PEEP, whereas those with mild ARDS did not. | Weak            | Moderate | RCTs        | 3 large multicentre trials and a pilot trial | NR                  | NR                                | NR       | NR                                                                  |

|                |                                                                                                                             |                                                                                                                                                             |                                                                                                                                                                                                                            |         |          |                                  |          |                                                                                           |                                                                                                         |          |                                                                                    |
|----------------|-----------------------------------------------------------------------------------------------------------------------------|-------------------------------------------------------------------------------------------------------------------------------------------------------------|----------------------------------------------------------------------------------------------------------------------------------------------------------------------------------------------------------------------------|---------|----------|----------------------------------|----------|-------------------------------------------------------------------------------------------|---------------------------------------------------------------------------------------------------------|----------|------------------------------------------------------------------------------------|
| Clasesson 2014 | High PEEP (>5cm H2O). In patients with moderate to severe ARDS we suggest increasing PEEP to improve oxygenation efficiency | Higher PEEP improves oxygenation efficiency without any significant increase in barotrauma, but may increase duration of mechanical ventilation and LOS-ICU | Has no demonstrable effect on mortality. Evidence in two recent systematic reviews suggest that any mortality benefit of higher PEEP is limited to patients with moderate to severe ARDS                                   | Weak    | Moderate | RCTs                             | 3 (2299) | 1) ALL hospital Mortality RR 0.94 (0.86-1.04)<br>2) ALL ICU mortality RR 0.87 (0.78-0.97) | 1) Barotrauma<br>2) Ventilator Free days<br>3) Use of Rescue Therapies<br>4) Death after rescue therapy | 3 (2299) | 1) RR 1.19 (0.89-1.6)<br>2) N/A<br>3) RR 0.64 (0.54-0.75)<br>4) RR 0.65 (0.52-0.8) |
| Choi 2016      | We suggest high PEEP can be applied to patients with ARDS, who have Pao2/FIO2<200 mmHg to reduce mortality                  | The cochrane review did not show significant difference in barotrauma between the two groups                                                                | A cochrane review which meta-analyzed 7 RCTs showed that high PEEP did not contribute to a reduction of hospital mortality, but in a secondary group where PaO2/FIO2 <200mmHg high PEEP decreased mortality within the ICU | Grade 2 | B level  | Meta Analysis + Clinical Studies | NR       | NR                                                                                        | NR                                                                                                      | NR       | NR                                                                                 |

|                           |                                                                                                                                                   |                                                                                                 |                                                                                                                                                                                                                                                  |      |     |      |          |                     |                         |    |                     |
|---------------------------|---------------------------------------------------------------------------------------------------------------------------------------------------|-------------------------------------------------------------------------------------------------|--------------------------------------------------------------------------------------------------------------------------------------------------------------------------------------------------------------------------------------------------|------|-----|------|----------|---------------------|-------------------------|----|---------------------|
| Alhazzan<br>i COVID<br>21 | For mechanically ventilated adults with COVID-19 and moderate to severe ARDS, we suggest using a higher PEEP strategy, over a lower PEEP strategy | In patients ARDS, a higher PEEP strategy resulted in a reduction in the use of rescue therapies | Individual patient data meta-analysis of 3 large trials of high PEEP found no difference in in-hospital mortality in all patients. However in patients ARDS, a higher PEEP strategy resulted in lower ICU mortality, lower in-hospital mortality | Weak | Low | RCTs | 3 (2299) | RR 0.94 (0.86-1.04) | Use of rescue therapies | NR | RR 0.63 (0.53-0.75) |
|---------------------------|---------------------------------------------------------------------------------------------------------------------------------------------------|-------------------------------------------------------------------------------------------------|--------------------------------------------------------------------------------------------------------------------------------------------------------------------------------------------------------------------------------------------------|------|-----|------|----------|---------------------|-------------------------|----|---------------------|

|               |                                                                  |    |                                                                                                                                                                                                                       |        |          |                       |    |                                                    |    |    |    |
|---------------|------------------------------------------------------------------|----|-----------------------------------------------------------------------------------------------------------------------------------------------------------------------------------------------------------------------|--------|----------|-----------------------|----|----------------------------------------------------|----|----|----|
| Fichtner 2018 | In patients with ARDS, ventilation with high PEEP is recommended | NR | Two meta-analyses, each of which was based on three multicenter RCTs, showed that ventilation with high PEEP lowers the mortality of ARDS patients, compared to ventilation with low PEEP or conventional ventilation | Strong | ++++     | RCT and Meta-analyses | NR | ICU: 37.6% vs. 56.3%; In-hospital: 34.1% vs. 39.1% | NR | NR | NR |
| Hashmi 2015   | Adequate PEEP to avoid alveolar collapse                         | NR | NR                                                                                                                                                                                                                    | Strong | Moderate | NR                    | NR | NR                                                 | NR | NR | NR |

|                |                                                                                                                              |    |                                                                                                                                                                                                                                                                            |        |          |      |    |                     |                                          |    |                                   |
|----------------|------------------------------------------------------------------------------------------------------------------------------|----|----------------------------------------------------------------------------------------------------------------------------------------------------------------------------------------------------------------------------------------------------------------------------|--------|----------|------|----|---------------------|------------------------------------------|----|-----------------------------------|
| Hashimoto 2017 | We suggest using PEEP within the range of plateau pressures less than or equal to 30cmH2O, without compromising hemodynamics | NR | We conducted a systematic review and included seven randomized clinical trials, which show that there are no differences in hospital mortality, incidence of barotrauma or ventilator-free days (VFD) comparing patient groups receiving higher PEEP and lower PEEP levels | Weak   | Moderate | RCTs | 3  | RR 0.93 (0.83-1.04) | 1) Barotrauma<br>2) Ventilator-Free Days | 7  | 1) 0.97<br>2) mean 1.89 days more |
| Pappazian 2019 | High PEEP should probably be used in patients with moderate or severe ARDS, but not in patients with mild ARDS.              | NR | NR                                                                                                                                                                                                                                                                         | Strong | High     | NR   | NR | NR                  | NR                                       | NR | NR                                |



|              |                                                 |    |    |          |     |    |    |    |    |    |    |
|--------------|-------------------------------------------------|----|----|----------|-----|----|----|----|----|----|----|
| Neto<br>2021 | We recommend using a “low PEEP/high FiO2 table” | NR | NR | Moderate | Low | NR | NR | NR | NR | NR | NR |
|--------------|-------------------------------------------------|----|----|----------|-----|----|----|----|----|----|----|

**Supplemental Digital Content 5.** A suggested framework for the design and development of a basic open-source ventilator that is evidence-based is shown below, divided into main categories of “Ventilation”, “Gas and Electricity”, and “Monitoring and Alarms”.

## **Ventilation**

1. Must have at least 1 *mode of ventilation*

a. Must have continuous mode ventilation (CMV).

b. The CMV mode must be either

i. (ideally) Pressure-controlled ventilation (PCV), or

ii. Volume-controlled ventilation (VCV).

c. Pressure Control Ventilation - a set pressure is delivered for the period of inspiration and the volume achieved is measured and displayed.

d. Volume Control Ventilation– the user sets a tidal volume and respiratory rate. The tidal volume is delivered during the inspiratory period. Acceptable only if additional pressure limiting controls are available.

e. Ideally should have a spontaneous breathing pressure support mode for those patients spontaneously breathing, e.g. BIPAP. The user sets an inspiratory pressure and an expiratory pressure, which is applied when the ventilator senses a patient starting to breathe in and when breathing out, respectively. The expiratory pressure is still positive pressure but lower than the inspiratory pressure.

2. If a ventilator has a pressure support mode, as a safety precaution, it must automatically default into a mandatory mode ventilation if the patient stops breathing in.

3. *Inspiratory airway pressure*, the higher pressure setting that is applied to make the patient breathe in:

- a. Can range from 20-70cm H<sub>2</sub>O.
- b. Must have the ability to conduct an inspiratory pause for the measurement and monitoring of plateau pressure.
- c. If volume control ventilation is used, the user must be able to set airway pressure limit between 15 – 40 cmH<sub>2</sub>O.

4. *Positive End Expiratory Pressure (PEEP)*. The pressure maintained in the breathing system during expiration.

- a. Ideal range 5-20 cm H<sub>2</sub>O adjustable in 2 cmH<sub>2</sub>O increments.
- b. PEEP must be maintained during expiration phase.

5. *Inspiratory:Expiratory ratio (I:E)*. The proportion of each breathing cycle that is spent breathing in compared to breathing out.

- a. Must provide 1:2 (i.e. expiration lasts twice as long as inspiration) as the default setting.
- b. Can provide adjustable I:E in the range 1:1 – 1:3.

6. *Respiratory Rate*. The number of breathing cycles every minute.

- a. Must provide a range 10 – 30 breaths per minute in increments of 2 (only in mandatory mode) that can be set by the user.

7. *Tidal Volume (V<sub>t</sub>) setting*, if provided. The volume of gas flowing into the lungs during one cycle.

- a. Must have at least one setting of 400ml +/- 10 ml.
- c. Could have a range 250 – 1000 ml in steps of 50ml.

## **Gas and Electricity**

1. *Incoming Gas Supply*.

- a. Must connect to wall pipeline oxygen supply.
- b. Oxygen supply from wall outlets outside of ICU and theatres is limited to approximately 6-10 lpm. As such, ventilators could provide for a gas reservoir to manage peak inspiratory flow rates of up to 100 lpm or an oxygen concentrator as the source of oxygen.

*2. Electricity Supply.*

- a. If electricity is required for functioning, there must be a battery backup of in case of electricity failure.

*3. Gas supply to patient.*

- a. User must be able to control inspired oxygen proportion (FiO<sub>2</sub>). The percentage of oxygen in the gas being breathed in by the patient. Room air is 21% oxygen.
- b. Must provide range of FiO<sub>2</sub> from 40% - 100% with 10% steps.

**Monitoring and Alarms**

*1. Must alarm at:*

- a. Gas or electricity supply failure.
- b. Machine switched off while in mandatory ventilation mode.
- c. Inspiratory airway pressure exceeded.
- d. Inspiratory and PEEP pressure not achieved (equivalent to disconnection alarm).
- e. Tidal volume not achieved or exceeded.

*2. Monitoring displayed continuously so the user can verify.*

- a. Must show the current settings of tidal volume, frequency, PEEP, FiO<sub>2</sub>, ventilation mode.
- b. Must show the actual current airway pressure.
- c. Should show the achieved tidal volume, breathing rate, PEEP, and FiO<sub>2</sub>.
- d. If pressure support mode is provided there must be real time confirmation of each patient breath and an alarm if below acceptable range.
- e. Could provide CO<sub>2</sub> monitoring.

## Supplemental Digital Content 6. PRISMA checklist.

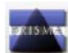

### PRISMA 2020 Checklist

| Section and Topic             | Item # | Checklist item                                                                                                                                                                                                                                                                                       | Location where item is reported |
|-------------------------------|--------|------------------------------------------------------------------------------------------------------------------------------------------------------------------------------------------------------------------------------------------------------------------------------------------------------|---------------------------------|
| <b>TITLE</b>                  |        |                                                                                                                                                                                                                                                                                                      |                                 |
| Title                         | 1      | Identify the report as a systematic review.                                                                                                                                                                                                                                                          | 1                               |
| <b>ABSTRACT</b>               |        |                                                                                                                                                                                                                                                                                                      |                                 |
| Abstract                      | 2      | See the PRISMA 2020 for Abstracts checklist.                                                                                                                                                                                                                                                         | 2-3                             |
| <b>INTRODUCTION</b>           |        |                                                                                                                                                                                                                                                                                                      |                                 |
| Rationale                     | 3      | Describe the rationale for the review in the context of existing knowledge.                                                                                                                                                                                                                          | 3-4                             |
| Objectives                    | 4      | Provide an explicit statement of the objective(s) or question(s) the review addresses.                                                                                                                                                                                                               | 4                               |
| <b>METHODS</b>                |        |                                                                                                                                                                                                                                                                                                      |                                 |
| Eligibility criteria          | 5      | Specify the inclusion and exclusion criteria for the review and how studies were grouped for the syntheses.                                                                                                                                                                                          | 5                               |
| Information sources           | 6      | Specify all databases, registers, websites, organisations, reference lists and other sources searched or consulted to identify studies. Specify the date when each source was last searched or consulted.                                                                                            | 6                               |
| Search strategy               | 7      | Present the full search strategies for all databases, registers and websites, including any filters and limits used.                                                                                                                                                                                 | 39-43                           |
| Selection process             | 8      | Specify the methods used to decide whether a study met the inclusion criteria of the review, including how many reviewers screened each record and each report retrieved, whether they worked independently, and if applicable, details of automation tools used in the process.                     | 5-6                             |
| Data collection process       | 9      | Specify the methods used to collect data from reports, including how many reviewers collected data from each report, whether they worked independently, any processes for obtaining or confirming data from study investigators, and if applicable, details of automation tools used in the process. | 6-7                             |
| Data items                    | 10a    | List and define all outcomes for which data were sought. Specify whether all results that were compatible with each outcome domain in each study were sought (e.g. for all measures, time points, analyses), and if not, the methods used to decide which results to collect.                        | 6-7                             |
|                               | 10b    | List and define all other variables for which data were sought (e.g. participant and intervention characteristics, funding sources). Describe any assumptions made about any missing or unclear information.                                                                                         | 6-7                             |
| Study risk of bias assessment | 11     | Specify the methods used to assess risk of bias in the included studies, including details of the tool(s) used, how many reviewers assessed each study and whether they worked independently, and if applicable, details of automation tools used in the process.                                    | 7                               |
| Effect measures               | 12     | Specify for each outcome the effect measure(s) (e.g. risk ratio, mean difference) used in the synthesis or presentation of results.                                                                                                                                                                  | 6-7                             |
| Synthesis methods             | 13a    | Describe the processes used to decide which studies were eligible for each synthesis (e.g. tabulating the study intervention characteristics and comparing against the planned groups for each synthesis (item #5)).                                                                                 | 7                               |
|                               | 13b    | Describe any methods required to prepare the data for presentation or synthesis, such as handling of missing summary statistics, or data conversions.                                                                                                                                                | N/A                             |
|                               | 13c    | Describe any methods used to tabulate or visually display results of individual studies and syntheses.                                                                                                                                                                                               | 7                               |
|                               | 13d    | Describe any methods used to synthesize results and provide a rationale for the choice(s). If meta-analysis was performed, describe the model(s), method(s) to identify the presence and extent of statistical heterogeneity, and software package(s) used.                                          | N/A                             |
|                               | 13e    | Describe any methods used to explore possible causes of heterogeneity among study results (e.g. subgroup analysis, meta-regression).                                                                                                                                                                 | N/A                             |
|                               | 13f    | Describe any sensitivity analyses conducted to assess robustness of the synthesized results.                                                                                                                                                                                                         | N/A                             |
| Reporting bias assessment     | 14     | Describe any methods used to assess risk of bias due to missing results in a synthesis (arising from reporting biases).                                                                                                                                                                              | N/A                             |
| Certainty assessment          | 15     | Describe any methods used to assess certainty (or confidence) in the body of evidence for an outcome.                                                                                                                                                                                                | 7                               |

| Section and Topic                              | Item # | Checklist item                                                                                                                                                                                                                                                                       | Location where item is reported |
|------------------------------------------------|--------|--------------------------------------------------------------------------------------------------------------------------------------------------------------------------------------------------------------------------------------------------------------------------------------|---------------------------------|
| <b>RESULTS</b>                                 |        |                                                                                                                                                                                                                                                                                      |                                 |
| Study selection                                | 16a    | Describe the results of the search and selection process, from the number of records identified in the search to the number of studies included in the review, ideally using a flow diagram.                                                                                         | 7-8                             |
|                                                | 16b    | Cite studies that might appear to meet the inclusion criteria, but which were excluded, and explain why they were excluded.                                                                                                                                                          | 7-8                             |
| Study characteristics                          | 17     | Cite each included study and present its characteristics.                                                                                                                                                                                                                            | 8-9                             |
| Risk of bias in studies                        | 18     | Present assessments of risk of bias for each included study.                                                                                                                                                                                                                         | 9                               |
| Results of individual studies                  | 19     | For all outcomes, present, for each study: (a) summary statistics for each group (where appropriate) and (b) an effect estimate and its precision (e.g. confidence/credible interval), ideally using structured tables or plots.                                                     | Tables 1-2                      |
| Results of syntheses                           | 20a    | For each synthesis, briefly summarise the characteristics and risk of bias among contributing studies.                                                                                                                                                                               | Tables 1-2                      |
|                                                | 20b    | Present results of all statistical syntheses conducted. If meta-analysis was done, present for each the summary estimate and its precision (e.g. confidence/credible interval) and measures of statistical heterogeneity. If comparing groups, describe the direction of the effect. | 9-13                            |
|                                                | 20c    | Present results of all investigations of possible causes of heterogeneity among study results.                                                                                                                                                                                       | N/A                             |
|                                                | 20d    | Present results of all sensitivity analyses conducted to assess the robustness of the synthesized results.                                                                                                                                                                           | N/A                             |
| Reporting biases                               | 21     | Present assessments of risk of bias due to missing results (arising from reporting biases) for each synthesis assessed.                                                                                                                                                              | N/A                             |
| Certainty of evidence                          | 22     | Present assessments of certainty (or confidence) in the body of evidence for each outcome assessed.                                                                                                                                                                                  | Tables 2-3                      |
| <b>DISCUSSION</b>                              |        |                                                                                                                                                                                                                                                                                      |                                 |
| Discussion                                     | 23a    | Provide a general interpretation of the results in the context of other evidence.                                                                                                                                                                                                    | 13-16                           |
|                                                | 23b    | Discuss any limitations of the evidence included in the review.                                                                                                                                                                                                                      | 13-16                           |
|                                                | 23c    | Discuss any limitations of the review processes used.                                                                                                                                                                                                                                | 13-16                           |
|                                                | 23d    | Discuss implications of the results for practice, policy, and future research.                                                                                                                                                                                                       | 13-16                           |
| <b>OTHER INFORMATION</b>                       |        |                                                                                                                                                                                                                                                                                      |                                 |
| Registration and protocol                      | 24a    | Provide registration information for the review, including register name and registration number, or state that the review was not registered.                                                                                                                                       | 5                               |
|                                                | 24b    | Indicate where the review protocol can be accessed, or state that a protocol was not prepared.                                                                                                                                                                                       | 5                               |
|                                                | 24c    | Describe and explain any amendments to information provided at registration or in the protocol.                                                                                                                                                                                      | N/A                             |
| Support                                        | 25     | Describe sources of financial or non-financial support for the review, and the role of the funders or sponsors in the review.                                                                                                                                                        | 1                               |
| Competing interests                            | 26     | Declare any competing interests of review authors.                                                                                                                                                                                                                                   | 1                               |
| Availability of data, code and other materials | 27     | Report which of the following are publicly available and where they can be found: template data collection forms; data extracted from included studies; data used for all analyses; analytic code; any other materials used in the review.                                           | N/A                             |

From: Page MJ, McKenzie JE, Bossuyt PM, Boutron I, Hoffmann TC, Mulrow CD, et al. The PRISMA 2020 statement: an updated guideline for reporting systematic reviews. *BMJ* 2021;372:n71. doi: 10.1136/bmj.n71

For more information, visit: <http://www.prisma-statement.org/>
